# Supplementary material for: A complicated biocomputing system based on multi-responsive P(NIPAM-co-APBA) copolymer film electrodes and electrocatalysis of NADH
Source: Royal Society of Chemistry journal article supplement (doi:10.1039/c7cp04030j), 2017-01-01
Supplement: c7cp04030j1.pdf [file c7cp04030j1.pdf]

**Electronic Supplementary Information**

**A complicated biocomputing system based on multi-responsive  
P(NIPAM-*co*-APBA) copolymer film electrodes and electrocatalysis  
of NADH**

Jiying Liang,<sup>a</sup> Xue Yu,<sup>a</sup> Tiangang Yang,<sup>a</sup> Menglu Li,<sup>a</sup> Li Shen,<sup>b</sup> Yue Jin<sup>c</sup> and  
Hongyun Liu<sup>a\*</sup>

<sup>a</sup> College of Chemistry, Beijing Normal University, Beijing 100875, People's  
Republic of China.

<sup>b</sup> Logist School, Beijing Wuzi University, Beijing 101149, P. R. China.

<sup>c</sup> Institute of Apicultural Research, Chinese Academy of Agricultural Sciences,  
Beijing 100093, P. R. China.

\*Corresponding author: Hongyun Liu, 19, Xijiekouwai Street, Haidian District,  
Beijing 100875, People's Republic of China. Tel: (86)-10-58807843. E-mail:  
liuhongyun@bnu.edu.cn.

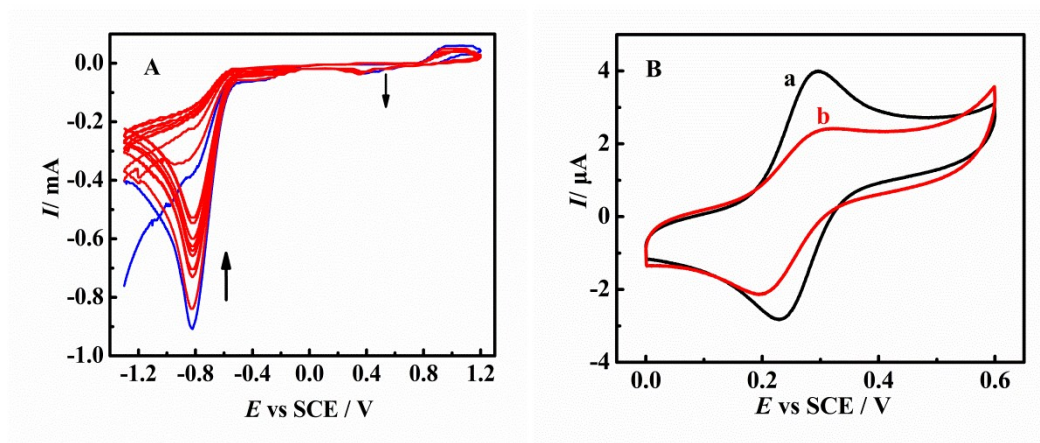

**Fig. S1** (A) Continuous CVs at  $0.1 \text{ V s}^{-1}$  for the electropolymerization of P(NIPAM-*co*-APBA) films at Au electrodes in the precursor solution. (B) CVs of 0.5 mM FCA at  $0.1 \text{ V s}^{-1}$  in pH 9.0 buffers at  $37^\circ\text{C}$  at (a) bare Au electrodes and (b) P(NIPAM-*co*-APBA) film electrodes.

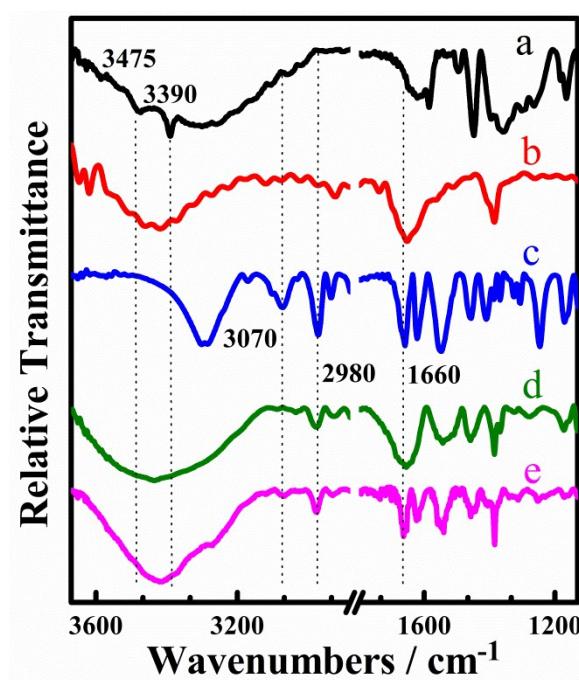

**Fig. S2** IR spectra of (a) APBA, (b) PAPBA, (c) NIPAM, (d) PNIPAM and (e) P(NIPAM-*co*-APBA) samples.

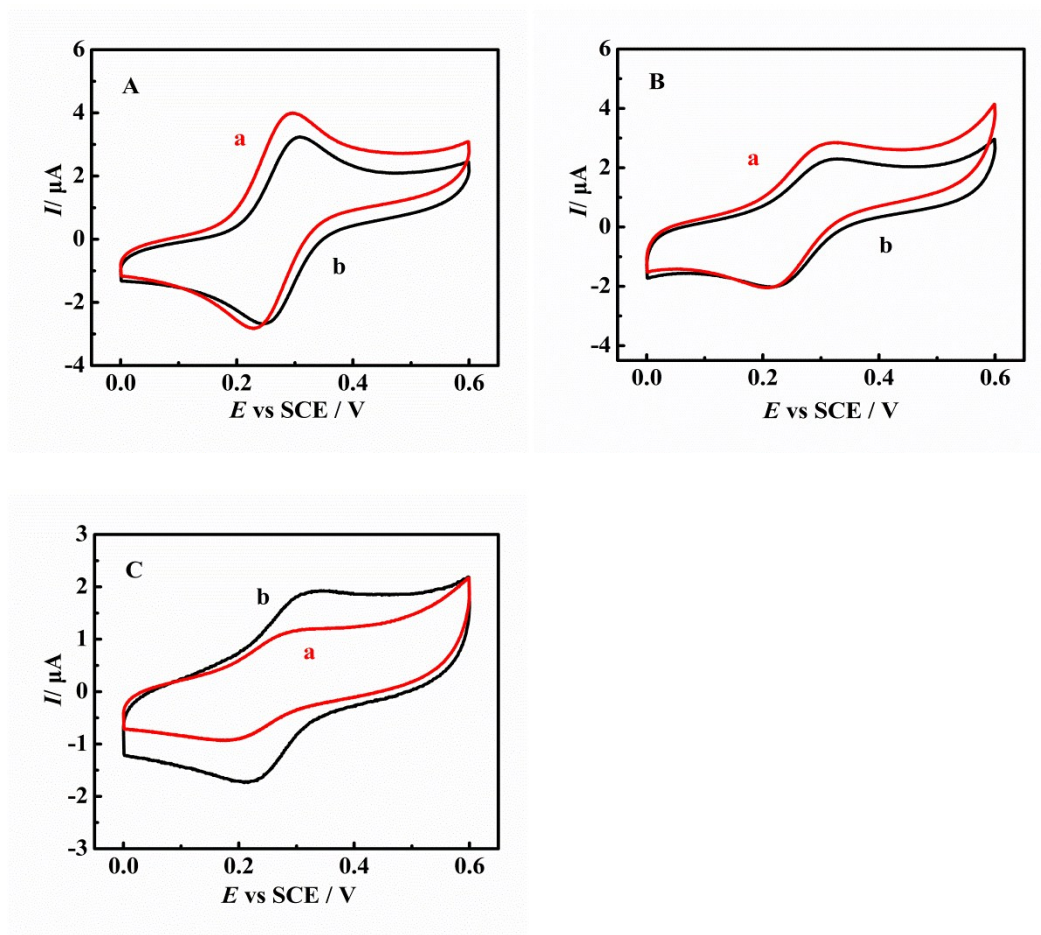

**Fig. S3** CVs of 0.5 mM FCA at  $0.1 \text{ V s}^{-1}$  at (A) bare Au electrodes, (B) PAPBA film electrodes and (C) PNIPAM film electrodes in pH 9.0 buffers at (a) 37 and (b) 20 °C, respectively.

**Table 1S** Water CA (°) of PNIPAM, PAPBA and P(NIPAM-co-APBA) films electropolymerized on ITO electrodes under different conditions. The CA value was the average of 5 measurements at different positions for the same sample with the standard deviation

|                                  | <b>PNIPAM</b> | <b>PAPBA</b> | <b>P(NIPAM-<i>co</i>-APBA)</b> |
|----------------------------------|---------------|--------------|--------------------------------|
| pH 9.0 at 20 °C                  | 46.8 ± 1.2    | 52.9 ± 2.6   | 72.1 ± 1.1                     |
| pH 9.0 at 37 °C                  | 98.3 ± 4.9    | 56.0 ± 2.4   | 30.6 ± 1.4                     |
| pH 9.0 at 37 °C<br>0.2 M glucose | 98.6 ± 4.9    | 30.6 ± 1.5   | 29.9 ± 1.0                     |
| pH 7.0 at 37 °C                  | 92.2 ± 4.6    | 65.2 ± 3.3   | 45.7 ± 2.3                     |

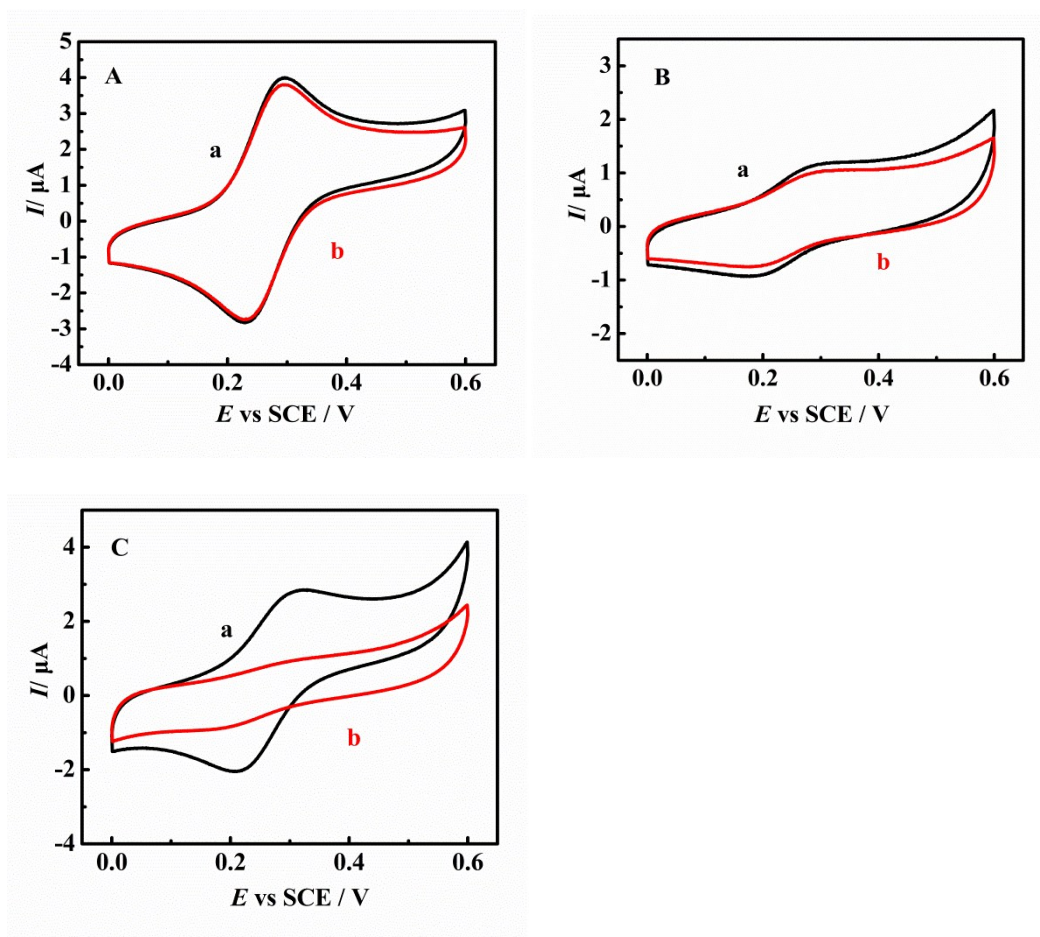

**Fig. S4** CVs of 0.5 mM FCA at 0.1 V s<sup>-1</sup> in pH 9.0 buffers at 37 °C at (A) bare Au, (B) PNIPAM and (C) PAPBA film electrodes with (a) 0 and (b) 0.2 M glucose, respectively.

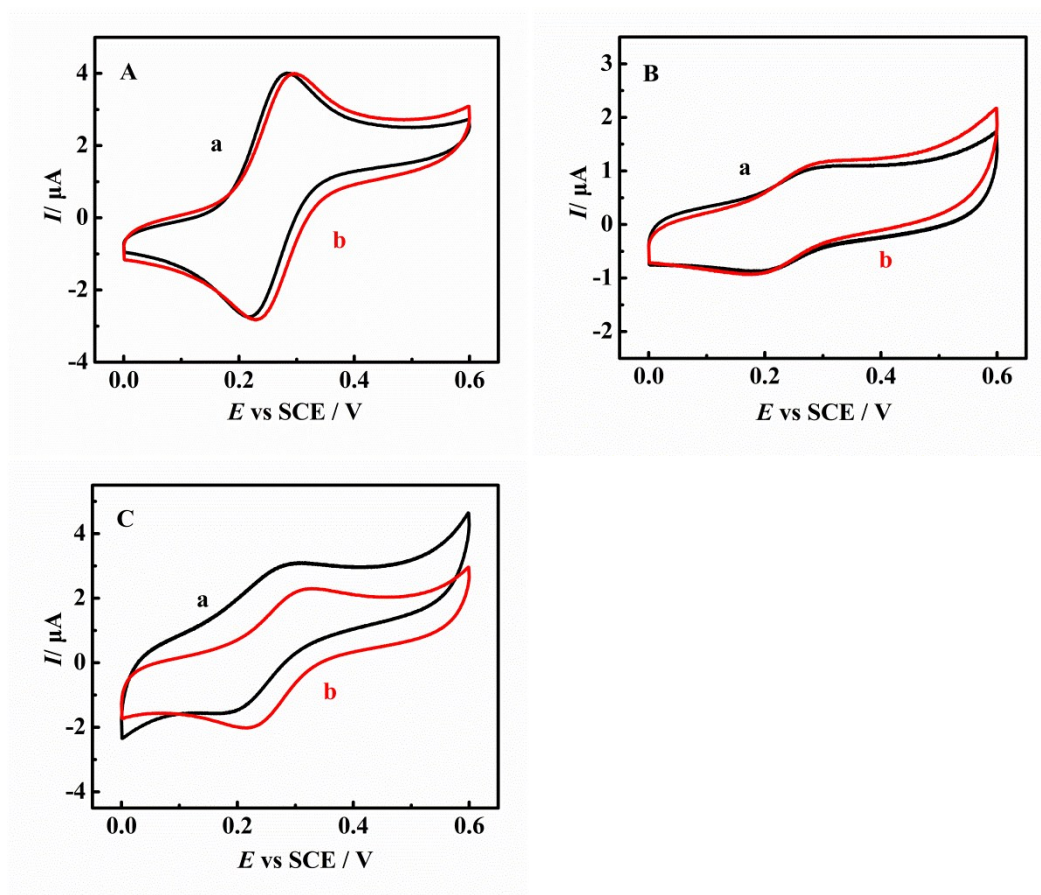

**Fig. S5** CVs of 0.5 mM FCA at 0.1 V s<sup>-1</sup> and at 37 °C at (A) bare Au, (B) PNIPAM and (C) PAPBA film electrodes in (a) pH 7.0 and (b) pH 9.0 buffers, respectively.

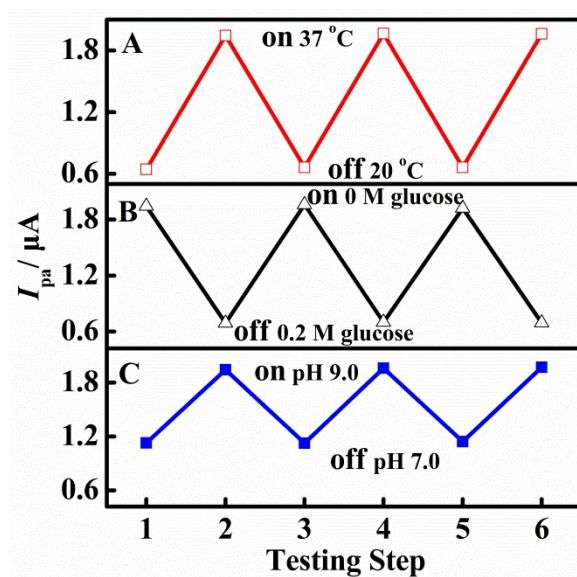

**Fig. S6** Dependence of CV  $I_{pa}$  of 0.5 mM FCA at 0.3 V for P(NIPAM-*co*-APBA) films at 0.01 V s<sup>-1</sup> in buffers containing 5 mM NADH on (A) the solution temperature switched between 20 and 37 °C at pH 9.0, (B) the glucose concentration cycled between 0 and 0.2 M at pH 9.0 and 37 °C, and (C) the solution pH switched between 7.0 and 9.0 at 37 °C.

**Table 2S** Truth table of the 4-input/4-output logic gate circuit on the platform of FCA

solution and P(NIPAM-*co*-APBA) films

| Input A<br>T | Input B<br>pH | Input C<br>NADH | Input D<br>Glucose | Output 1<br>$I_{pa} < 0.3$ | Output 2<br>$0.3 \leq I_{pa} < 0.9$ | Output 3<br>$0.9 \leq I_{pa} < 1.4$ | Output 4<br>$I_{pa} \geq 1.4$ |
|--------------|---------------|-----------------|--------------------|----------------------------|-------------------------------------|-------------------------------------|-------------------------------|
| 0            | 0             | 0               | 0                  | 0                          | 1                                   | 0                                   | 0                             |
| 0            | 0             | 0               | 1                  | 1                          | 0                                   | 0                                   | 0                             |
| 0            | 0             | 1               | 0                  | 0                          | 1                                   | 0                                   | 0                             |
| 0            | 0             | 1               | 1                  | 0                          | 1                                   | 0                                   | 0                             |
| 0            | 1             | 0               | 0                  | 0                          | 1                                   | 0                                   | 0                             |
| 0            | 1             | 0               | 1                  | 1                          | 0                                   | 0                                   | 0                             |
| 0            | 1             | 1               | 0                  | 0                          | 1                                   | 0                                   | 0                             |
| 0            | 1             | 1               | 1                  | 0                          | 1                                   | 0                                   | 0                             |
| 1            | 0             | 0               | 0                  | 0                          | 1                                   | 0                                   | 0                             |
| 1            | 0             | 0               | 1                  | 0                          | 1                                   | 0                                   | 0                             |
| 1            | 0             | 1               | 0                  | 0                          | 0                                   | 1                                   | 0                             |
| 1            | 0             | 1               | 1                  | 0                          | 1                                   | 0                                   | 0                             |
| 1            | 1             | 0               | 0                  | 0                          | 1                                   | 0                                   | 0                             |
| 1            | 1             | 0               | 1                  | 0                          | 1                                   | 0                                   | 0                             |
| 1            | 1             | 1               | 0                  | 0                          | 0                                   | 0                                   | 1                             |
| 1            | 1             | 1               | 1                  | 0                          | 1                                   | 0                                   | 0                             |

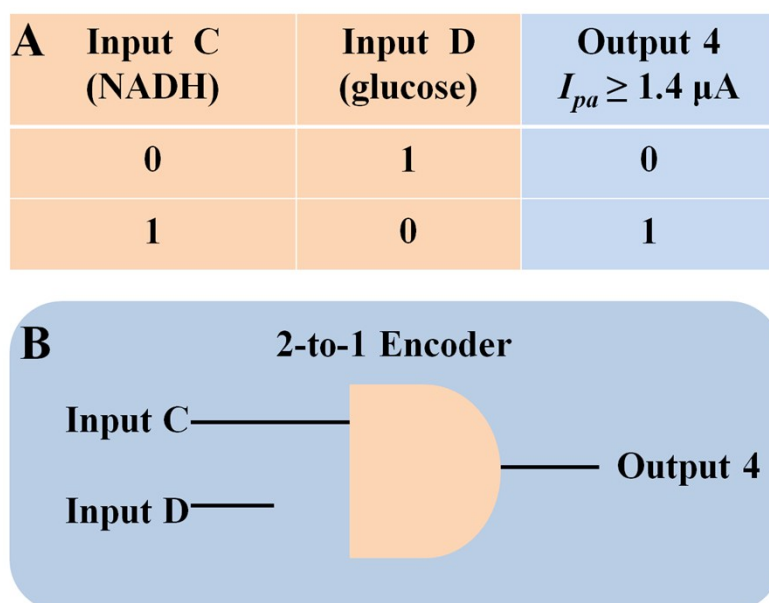

**Fig. S7** (A) Truth tables and (B) schematic representation of 2-to-1 encoder on the platform of FCA solution at 37 °C and pH 9.0 and P(NIPAM-*co*-APBA) films with NADH and glucose as 2 inputs and Output 4 as the output.
